# Supplementary material for: Traits and QTLs for development of dry direct-seeded rainfed rice varieties
Source: PubMed Central journal article supplement (PMC4265160; doi:10.1093/jxb/eru413), 2014-10-21
Supplement: supp_eru413_jexbot120410_file001.pdf [file supp_eru413_jexbot120410_file001.pdf]

**Table S1.** *Root hair length, density and lateral root rating*

---

| Root hair rating    | Category            |
|---------------------|---------------------|
| 1                   | no root hair        |
| 2                   | short and sparse    |
| 3                   | short and dense     |
| 4                   | long and sparse     |
| 5                   | long and dense      |
| Lateral root rating |                     |
| 0                   | none or almost none |
| 1                   | sparse              |
| 2                   | dense               |
| 3                   | dense and branching |

---

**Table S2.** Descriptive trait statistics for parents (Aus276, MTU1010 and IR64) and mapping populations subjected to seedling stage stress under direct seeded upland conditions

| Trait                                     | Population      | 2012WUS       | 2013DUS       |
|-------------------------------------------|-----------------|---------------|---------------|
| Seed weight (g)                           | Aus276          | 2.579± 0.26   | 2.72± 0.21    |
|                                           | MTU1010         | 1.849± 0.18   | 1.43± 0.32    |
|                                           | Population mean | 2.034± 0.015  | 2.11± 0.009   |
|                                           | Aus276          | 2.34± 0.24    | 2.12±0.25     |
|                                           | IR64            | 1.98± 0.13    | 1.66±0.14     |
| Dry shoot weight (g) (15 DAS)             | Population mean | 2.07± 0.014   | 2.05±0.014    |
|                                           | Aus276          | 0.058± 0.019  | 0.146± 0.039  |
|                                           | MTU1010         | 0.062± 0.012  | 0.150± 0.091  |
|                                           | Population mean | 0.061± 0.001  | 0.139± 0.002  |
|                                           | Aus276          | 0.071 ± 0.025 | 0.17±0.049    |
| Dry shoot weight (g) (22 DAS)             | IR64            | 0.067± 0.021  | 0.14±0.09     |
|                                           | Population mean | 0.076±0.0014  | 0.15± 0.003   |
|                                           | Aus276          | 0.182± 0.025  | 0.272±0.032   |
|                                           | MTU1010         | 0.188± 0.063  | 0.230±0.020   |
|                                           | Population mean | 0.198± 0.004  | 0.234±0.004   |
| Dry shoot weight (g) (30 DAS)             | Aus276          | 0.17±0.069    | 0.33±0.08     |
|                                           | IR64            | 0.19± 0.072   | 0.28± 0.02    |
|                                           | Population mean | 0.20± 0.004   | 0.27±0.005    |
|                                           | Aus276          | 0.414± 0.17   | 0.465± 0.10   |
|                                           | MTU1010         | 0.355± 0.11   | 0.375± 0.14   |
| First Emergence (Days to first emergence) | Population mean | 0.401± 0.01   | 0.380±0.006   |
|                                           | Aus276          | 0.48± 0.018   | 0.49± 0.016   |
|                                           | IR64            | 0.44± 0.019   | 0.45± 0.016   |
|                                           | Population mean | 0.51± 0.012   | 0.46± 0.009   |
|                                           | Aus276          | -             | 3.0±0.41      |
| Full emergence (Days to full emergence)   | MTU1010         | -             | 4.0± 0.56     |
|                                           | Population mean | -             | 3.6± 0.023    |
|                                           | Aus276          | -             | 3.0±0.49      |
|                                           | IR64            | -             | 4.1± 0.21     |
|                                           | Population mean | -             | 3.3± 0.03     |
| RGR <sub>12</sub> (g days <sup>-1</sup> ) | Aus276          | -             | 7.0±0.80      |
|                                           | MTU1010         | -             | 8.0±0.12      |
|                                           | Population mean | -             | 7.4±0.046     |
|                                           | Aus276          | -             | 6.9±1.15      |
|                                           | IR64            | -             | 7.8±1.01      |
| RGR <sub>23</sub> (g days <sup>-1</sup> ) | Population mean | -             | 6.5±0.07      |
|                                           | Aus276          | 0.167±0.05    | 0.0874±0.079  |
|                                           | MTU1010         | 0.152±0.01    | 0.0645± 0.038 |
|                                           | Population mean | 0.196±0.003   | 0.0724± 0.002 |
|                                           | Aus276          | 0.126±0.35    | 0.096± 0.04   |
| RGR <sub>13</sub> (g days <sup>-1</sup> ) | IR64            | 0.151± 0.22   | 0.097± 0.01   |
|                                           | Population mean | 0.166 ± 0.02  | 0.081± 0.002  |
|                                           | Aus276          | 0.116± 0.053  | 0.0763± 0.042 |
|                                           | MTU1010         | 0.092±0.034   | 0.0706± 0.019 |
|                                           | Population mean | 0.137±0.003   | 0.0721± 0.002 |
| Nodal root number (15 DAS)                | Aus276          | 0.178±0.50    | 0.058± 0.05   |
|                                           | IR64            | 0.160±0.44    | 0.068± 0.04   |
|                                           | Population mean | 0.209± 0.03   | 0.073±0.003   |
|                                           | Aus276          | 0.283± 0.063  | 0.164± 0.048  |
|                                           | MTU1010         | 0.241± 0.033  | 0.135± 0.080  |
| Nodal root number (15 DAS)                | Population mean | 0.260± 0.004  | 0.144± 0.003  |
|                                           | Aus276          | 0.279±0.07    | 0.154± 0.050  |
|                                           | IR64            | 0.220±0.04    | 0.166± 0.011  |
|                                           | Population mean | 0.246±0.004   | 0.175± 0.003  |
|                                           | Aus276          | 10.4±1.16     | 7.8±2.29      |
| Nodal root number (15 DAS)                | MTU1010         | 11.9±1.12     | 9.2±1.73      |
|                                           | Population mean | 10.7±0.182    | 8.4±0.132     |

|                                    |                 |              |             |
|------------------------------------|-----------------|--------------|-------------|
|                                    | Aus276          | 14.0±2.43    | 9.6±2.05    |
|                                    | IR64            | 8.0±2.31     | 9.0±1.11    |
|                                    | Population mean | 10.4±0.14    | 10.52±0.12  |
| Nodal root number (22 DAS)         | Aus276          | 13.4±2.73    | 10.1±1.45   |
|                                    | MTU1010         | 10.1±1.18    | 9.3±1.60    |
|                                    | Population mean | 12.6± 0.158  | 12.8±0.084  |
|                                    | Aus276          | 20.4± 3.01   | 13.0± 4.7   |
|                                    | IR64            | 13.0 ± 2.9   | 16.3± 2.22  |
|                                    | Population mean | 13.1±0.17    | 18.4±0.27   |
| Nodal root number (30 DAS)         | Aus276          | 17.2±2.01    | 15±2.83     |
|                                    | MTU1010         | 15.4±1.19    | 17.6±1.28   |
|                                    | Population mean | 23.9± 0.231  | 22.7±0.221  |
|                                    | Aus276          | 25.6± 3.97   | 22.0± 2.14  |
|                                    | IR64            | 20.7± 0.23   | 23.3± 4.9   |
|                                    | Population mean | 18.0± 2.81   | 28.3± 0.29  |
| Root hair length                   | Aus276          | 1.408± 0.32  | 1.467±0.43  |
|                                    | MTU1010         | 1.161± 0.30  | 1.133±0.76  |
|                                    | Population mean | 1.243± 0.018 | 1.349±0.025 |
|                                    | Aus276          | 1.54±0.32    | 1.30± 0.35  |
|                                    | IR64            | 1.02±0.24    | 1.11± 0.11  |
|                                    | Population mean | 1.30±0.019   | 1.27± 0.02  |
| Root hair density                  | Aus276          | 1.446± 0.24  | 1.43±0.43   |
|                                    | MTU1010         | 1.322± 0.11  | 1.267±0.48  |
|                                    | Population mean | 1.157± 0.014 | 1.32±0.025  |
|                                    | Aus276          | 1.36±0.29    | 1.39± 0.30  |
|                                    | IR64            | 1.09±0.11    | 1.16± 0.14  |
|                                    | Population mean | 1.24±0.017   | 1.24± 0.018 |
| Lateral root rating                | Aus276          | -            | 2.5±0.14    |
|                                    | MTU1010         | -            | 1.8±0.33    |
|                                    | Population mean | -            | 2.2±0.021   |
|                                    | Aus276          | -            | 2.1±0.22    |
|                                    | IR64            | -            | 1.7±0.81    |
|                                    | Population mean |              | 2.6±0.047   |
| Biomass (g)                        | Aus276          | 55.34±9.09   | 45.56±3.97  |
|                                    | MTU1010         | 59.23±13.06  | 36.64±5.73  |
|                                    | Population mean | 54.67±1.33   | 31.29±4.85  |
|                                    | Aus276          | 45.41±12.43  | 43.08± 9.56 |
|                                    | IR64            | 54.57± 8.26  | 26.88± 4.11 |
|                                    | Population mean | 61.69±1.41   | 37.81± 5.46 |
| Harvest index                      | Aus276          | 0.290± 0.064 | 0.170±0.072 |
|                                    | MTU1010         | 0.262± 0.021 | 0.139±0.016 |
|                                    | Population mean | 0.274± 0.004 | 0.137±0.004 |
|                                    | Aus276          | 0.243±0.061  | 0.186±0.07  |
|                                    | IR64            | 0.296±0.065  | 0.102±0.02  |
|                                    | Population mean | 0.232± 0.004 | 0.128±0.004 |
| Grain yield (kg ha <sup>-1</sup> ) | Aus276          | 561±88.83    | 680±198.25  |
|                                    | MTU1010         | 472±59.68    | 545±187.75  |
|                                    | Population mean | 523± 92.58   | 770±201.23  |
|                                    | Aus276          | 861±100.01   | 962±211.02  |
|                                    | IR64            | 684±101.12   | 867± 119.7  |
|                                    | Population mean | 766±80.59    | 886±121.74  |

**Table S3.** Descriptive trait statistics for parents (Aus276, IR64, and MTU1010) and mapping populations subjected to reproductive stress and non-stress treatments in lowland and direct-seeded upland conditions

| Population     | Trait                        |                     | 2012DUR | 2013DUR | 2012DUN | 2012DLR | 2012DLN |
|----------------|------------------------------|---------------------|---------|---------|---------|---------|---------|
| Aus276/MTU1010 | GY<br>(kg ha <sup>-1</sup> ) | Aus276              | 1201    | 1098    | 2942    | 1305    | 3622    |
|                |                              | MTU1010             | 643     | 522     | 3388    | 1172    | 3432    |
|                |                              | Population mean     | 889     | 770     | 1662    | 1550    | 4244    |
|                |                              | Highest line        | 1679    | 1267    | 3900    | 2846    | 6848    |
|                |                              | Lowest line         | 129     | 122     | 265     | 588     | 1848    |
|                |                              | LSD <sub>0.05</sub> | 504     | 683     | 1420    | 894     | 1542    |
|                | PHT<br>(cm)                  | Aus276              | 92      | 69      | 95      | 83      | 96      |
|                |                              | MTU1010             | 73      | 66      | 102     | 86      | 100     |
|                |                              | Population mean     | 77      | 64      | 103     | 106     | 122     |
|                |                              | Highest line        | 112     | 84      | 134     | 136     | 154     |
|                |                              | Lowest line         | 48      | 41      | 70      | 70      | 81      |
|                |                              | LSD <sub>0.05</sub> | 22      | 17      | 26      | 21      | 22      |
|                | DTF<br>(days)                | Aus276              | 75      | 93      | 78      | 80      | 80      |
|                |                              | MTU1010             | 85      | 91      | 71      | 82      | 81      |
|                |                              | Population mean     | 92      | 98      | 80      | 83      | 78      |
|                |                              | Highest line        | 109     | 112     | 92      | 87      | 84      |
|                |                              | Lowest line         | 72      | 80      | 67      | 71      | 72      |
|                |                              | LSD <sub>0.05</sub> | 12      | 12      | 9       | 17      | 4       |
|                | EVV                          | Aus276              | -       | 3.6     | -       | -       | -       |
|                |                              | MTU1010             | -       | 4.7     | -       | -       | -       |
|                |                              | Population mean     | -       | 4.9     | -       | -       | -       |
|                |                              | Highest line        | -       | 2.4     | -       | -       | -       |
|                |                              | Lowest line         | -       | 8.6     | -       | -       | -       |
|                |                              | LSD <sub>0.05</sub> | -       | 2.4     | -       | -       | -       |
|                | HI                           | Aus276              | -       | 0.0098  | -       | -       | -       |
|                |                              | MTU1010             | -       | 0.0069  | -       | -       | -       |
|                |                              | Population mean     | -       | 0.0051  | -       | -       | -       |
|                |                              | Highest line        | -       | 0.0302  | -       | -       | -       |
|                |                              | Lowest line         | -       | 0.0014  | -       | -       | -       |
|                |                              | LSD <sub>0.05</sub> | -       | 0.0017  | -       | -       | -       |
| Aus276/IR64    | GY<br>(kg ha <sup>-1</sup> ) | Aus276              | 1696    | 961     | 2557    | 3346    | 4085    |
|                |                              | IR64                | 593     | 492     | 1663    | 2368    | 3211    |
|                |                              | Population mean     | 1073    | 717     | 1167    | 2563    | 4586    |
|                |                              | Highest line        | 2152    | 1470    | 2770    | 5992    | 7378    |
|                |                              | Lowest line         | 258     | 118     | 175     | 733     | 2182    |
|                |                              | LSD <sub>0.05</sub> | 377     | 591     | 1073    | 1813    | 1636    |
|                | PHT<br>(cm)                  | Aus276              | 87      | 70      | 96      | 104     | 98      |
|                |                              | IR64                | 59      | 55      | 84      | 73      | 104     |
|                |                              | Population mean     | 75      | 65      | 106     | 100     | 135     |
|                |                              | Highest line        | 112     | 83      | 136     | 126     | 166     |
|                |                              | Lowest line         | 50      | 42      | 70      | 65      | 74      |
|                |                              | LSD <sub>0.05</sub> | 21      | 17      | 26      | 17      | 23      |
|                | DTF<br>(days)                | Aus276              | 81      | 88      | 75      | 81      | 80      |
|                |                              | IR64                | 95      | 98      | 85      | 84      | 80      |
|                |                              | Population mean     | 93      | 96      | 83      | 82      | 77      |
|                |                              | Highest line        | 108     | 111     | 113     | 97      | 82      |
|                |                              | Lowest line         | 72      | 88      | 71      | 71      | 68      |
|                |                              | LSD <sub>0.05</sub> | 11      | 10      | 9       | 11      | 4       |
|                | EVV                          | Aus276              | -       | 4.2     | -       | -       | -       |
|                |                              | MTU1010             | -       | 5.6     | -       | -       | -       |
|                |                              | Population mean     | -       | 5.0     | -       | -       | -       |
|                |                              | Highest line        | -       | 1.5     | -       | -       | -       |
|                |                              | Lowest line         | -       | 8.9     | -       | -       | -       |
|                |                              | LSD <sub>0.05</sub> | -       | 2.6     | -       | -       | -       |
|                | HI                           | Aus276              | -       | 0.0076  | -       | -       | -       |
|                |                              | MTU1010             | -       | 0.0030  | -       | -       | -       |
|                |                              | Population mean     | -       | 0.0048  | -       | -       | -       |
|                |                              | Highest line        | -       | 0.0220  | -       | -       | -       |
|                |                              | Lowest line         | -       | 0.0010  | -       | -       | -       |
|                |                              | LSD <sub>0.05</sub> | -       | 0.0013  | -       | -       | -       |

**Table S4.** *QTL identified under different cultivation conditions in the Aus276/3\*IR64 population.*

| Trait | chr                  | Year    | Flanking markers      | Marker closest to Peak | Position | Additive effect       | Additive effect % | R <sup>2</sup> (%) |       |       |      |
|-------|----------------------|---------|-----------------------|------------------------|----------|-----------------------|-------------------|--------------------|-------|-------|------|
|       |                      |         |                       |                        |          |                       |                   |                    |       |       |      |
| GY    | qGY <sub>6.1</sub>   | 2012DUR | id6010515-id6015531   | id6015531              | 107.5    | -15.44                | 18.61%            | 10.1%              |       |       |      |
|       |                      | 2013DUR |                       |                        | 104.5    | -22.78                | 35.77%            | 11.2%              |       |       |      |
|       | qGY <sub>8.1</sub>   | 2012DUR | id8003773-ud8001270   | id8003773              | 56.3     | -71.82                | 36.58%            | 10.4%              |       |       |      |
|       |                      | 2013DUR |                       |                        |          | -52.33                | 26.62%            | 8.2%               |       |       |      |
|       | qGY <sub>9.2</sub>   | 2012DUR | id9004128-id9005890   | id9004128              | 58.0     | 96.85                 | 31.29%            | 7.4%               |       |       |      |
|       |                      | 2013DUR |                       |                        |          | 42.39                 | 44.44%            | 8.4%               |       |       |      |
|       | qGY <sub>9.1</sub>   | 2012WUS | id9003600-id9004128   | id9003600              | 49.6     | 30.09                 | 15.71%            | 6.1%               |       |       |      |
|       |                      | 2013DUS |                       |                        |          | 10.77                 | 32.86%            | 6.1%               |       |       |      |
|       | qGY <sub>10.1</sub>  | 2012DUN | id10005369-id10006378 | id10006378             | 57.3     | 164.63                | 14.25%            | 7.0%               |       |       |      |
|       |                      | 2013DUN |                       |                        |          | 58.7                  | 183.31            | 8.0%               | 4.3%  |       |      |
|       |                      | 2012DLN |                       |                        |          | 57.7                  | -289.61           | 6.28%              | 8.1%  |       |      |
|       |                      | 2012DLR |                       |                        |          | 58.7                  | -361.22           | 13.32%             | 12.6% |       |      |
|       | qGY <sub>1.1</sub>   | 2013DUN | K_id1024836-id1026726 | id1026726              | 162.3    | -542.09               | 23.65%            | 7.6%               |       |       |      |
|       |                      | 2012DLN |                       |                        |          | -526.39               | 11.42%            | 8.1%               |       |       |      |
| DTF   | qDTF <sub>6.1</sub>  | 2012DLN | ud6000218-id6004089   | id6004089              | 26.4     | -1.72                 | 2.21%             | 12.6%              |       |       |      |
|       |                      | 2012DLR |                       |                        |          | -2.78                 | 3.29%             | 12.2%              |       |       |      |
|       | qDTF <sub>10.1</sub> | 2012DUN | id10003870-id10005369 | id10005369             | 45.7     | -1.47                 | 1.77%             | 7.6%               |       |       |      |
|       |                      | 2013DUN |                       |                        |          | -1.50                 | 1.83%             | 8.5%               |       |       |      |
|       |                      | 2012DLN |                       |                        | 49.7     | -1.65                 | 2.12%             | 14.4%              |       |       |      |
|       |                      | 2012DLR |                       |                        |          | -1.83                 | 2.17%             | 9.5%               |       |       |      |
|       | qDTF <sub>4.1</sub>  | 2013DUN | id4001205-id4002844   | id4002844              | 13.2     | -3.47                 | 5.7%              | 4.9%               |       |       |      |
| PHT   | qPHT <sub>1.2</sub>  | 2012DUN | K_id1024836-id1026726 | id1026726              | 162.3    | -6.51                 | 6.06%             | 8.4%               |       |       |      |
|       |                      | 2013DUN |                       |                        |          | -4.28                 | 3.8%              | 12.0%              |       |       |      |
|       | qPHT <sub>1.1</sub>  | 2012DUN | K_id1021259-id1024167 | id1024167              | 144.2    | -4.22                 | 3.68%             | 12.2%              |       |       |      |
|       |                      | 2013DUN |                       |                        |          | -4.70                 | 4.18%             | 14.9%              |       |       |      |
|       |                      | 2012DLN |                       |                        |          | -3.62                 | 2.62%             | 11.5%              |       |       |      |
|       |                      | 2012DLR |                       |                        |          | -4.87                 | 4.92%             | 17.2%              |       |       |      |
|       |                      | 2012DUR |                       |                        |          | K_id1021259-id1024167 | id1024167         | 142.2              | -3.07 | 4.12% | 7.7% |
|       |                      | 2013DUR |                       |                        |          |                       |                   | 142.2              | -2.91 | 4.54% | 9.6% |
|       | qPHT <sub>4.1</sub>  | 2012DUN | id4002844-id4004639   | id4004639              | 20.2     | 1.83                  | 1.58%             | 6.9%               |       |       |      |
|       |                      | 2013DUN |                       |                        |          | 1.95                  | 1.73%             | 6.2%               |       |       |      |
|       | qPHT <sub>4.2</sub>  | 2012DUR | id4011542-id4012189   | id4011542              | 121.6    | -1.71                 | 1.82%             | 6.4%               |       |       |      |
|       |                      | 2013DUR |                       |                        |          | -1.87                 | 2.92%             | 6.8%               |       |       |      |
|       | qPHT <sub>10.1</sub> | 2012DLN | id10005369-id10006378 | id10005369             | 52.3     | -8.24                 | 5.97%             | 12.8%              |       |       |      |
|       |                      | 2012DLR |                       |                        |          | -4.73                 | 4.78%             | 12.5%              |       |       |      |

|                       |                      |             |                         |                               |                 |           |             |                      |
|-----------------------|----------------------|-------------|-------------------------|-------------------------------|-----------------|-----------|-------------|----------------------|
| SW                    | qSW <sub>5.1</sub>   | 2012DUR     | id5004150-id5006615     | id5006615                     | 52.6            | -0.11     | 5.4%        | 7.3%                 |
|                       |                      | 2013DUR     |                         |                               |                 | -0.12     | 5.6%        | 7.1%                 |
| NR                    | qNR <sub>4.1</sub>   | 2012WUS     | id4001205-id4002844     | id4001205                     | 14.2            | 1.10      | 5.23%       | 7.1%                 |
|                       |                      | 2013DUS     |                         |                               |                 | 13.2      | 1.28        | 5.41%                |
| EVV                   | qEVV <sub>9.1</sub>  | 2012WUS     | id9003600-id9004128     | id9003600                     | 49.6            | 0.025     | 10.57%      | 5.8%                 |
|                       |                      | 2013DUS     |                         |                               |                 | 0.034     | 21.93%      | 6.5%                 |
| RHL                   | qRHL <sub>8.1</sub>  | 2012WUS     | id8002306-id8003773     | id8002306                     | 46.2            | -0.086    | 6.43%       | 7.1%                 |
|                       |                      | 2013DUS     |                         |                               |                 | 43.3      | -0.097      | 7.43%                |
| RHD                   | qRHD <sub>8.1</sub>  | 2012WUS     | id8000536-id8000845     | id8000845                     | 15.4            | 0.0617    | 5.1%        | 6.6%                 |
|                       |                      | 2013DUS     |                         |                               |                 | 0.0627    | 5.2%        | 6.5%                 |
|                       | qRHD <sub>5.1</sub>  | 2012WUS     | id5004150-id5006615     | id5004150                     | 51.6            | 0.0885    | 7.3%        | 6.3%                 |
|                       |                      | 2013DUS     |                         |                               |                 | 0.0984    | 8.1         | 6.6%                 |
| HI                    | qHI <sub>6.1</sub>   | 2012WUS     | ud6000218-id6004089     | id6004089                     | 30.4            | 0.024     | 11.60%      | 8.9%                 |
|                       |                      | 2013DUS     |                         |                               |                 | 27.7      | 0.025       | 13.39%               |
|                       | qHI <sub>10.1</sub>  | 2013DUN     | id10005369-id10006378   | id10006378                    | 56.3            | 0.018     | 8.6%        | 7.3%                 |
|                       | qHI <sub>10.2</sub>  | 2012WUS     | id10006378-id10006890   | id10006890                    | 71.8            | 0.019     | 9.23%       | 7.7%                 |
| 2013DUS               |                      | 71.3        |                         |                               |                 |           |             |                      |
| Biomass               | qBio <sub>6.1</sub>  | 2012WUS     | id6006288-id6010515     | id6010515                     | 59.6            | -11.12    | 15.92%      | 8.1%                 |
|                       |                      | 2013DUS     |                         |                               |                 | 61.6      | -18.88      | 19.91%               |
|                       | qBio <sub>10.1</sub> | 2012WUS     | id10003870-id10005369   | id10005369                    | 45.7            | -6.58     | 10.37%      | 6.3%                 |
|                       |                      | 2013DUS     |                         |                               |                 |           |             |                      |
| Al conc               | qAl <sub>5.2</sub>   | 2013DUS     | id5006615-id5007304     | id5006615                     | 63.3            | -0.603    | 54.43%      | 3.0%                 |
| Cu conc               | qCu <sub>8.1</sub>   | 2013DUS     | id8000845-id8001326     | id8000845                     | 29.3            | 0.005     | 10.36%      | 11.7%                |
| Fe conc               | qFe <sub>5.2</sub>   | 2013DUS     | id5006615-id5007304     | id5006615                     | 63.3            | -0.644    | 38.26%      | 13.3%                |
| N conc                | qN <sub>5.1</sub>    | 2013DUS     | id5004150-id5006615     | id5004150                     | 51.6            | -0.1180   | 12.46%      | 20.7%                |
| P conc                | qP <sub>5.2</sub>    | 2013DUS     | id5006615-id5007304     | id5006615                     | 63.3            | -0.0615   | 23.3%       | 12.3%                |
| Al uptake             | qAlU <sub>5.2</sub>  | 2013DUS     | id5006615-id5007304     | id5006615                     | 63.3            | -1.621    | 43.76%      | 11.5%                |
| Fe Uptake             | qFeU <sub>5.2</sub>  | 2013DUS     | id5006615-id5007304     | id5006615                     | 63.3            | -4.481    | 78.49%      | 11.7%                |
| P uptake              | qPU <sub>5.2</sub>   | 2013DUS     | id5006615-id5007304     | id5006615                     | 63.3            | -3.061    | 42.51%      | 12.3%                |
| Zn uptake             | qZnU <sub>4.1</sub>  | 2013DUS     | id4002844-id4004639     | id4004639                     | 20.2            | 0.1134    | 15.77%      | 12.0%                |
| Nematode GR           | qGR <sub>5.2</sub>   | 2013DUS     | id5006615-id5007304     | id5006615                     | 63.3            | -0.9310   | 28.8%       | 13.7%                |
| <b>Epistatic QTLs</b> |                      |             |                         |                               |                 |           |             |                      |
| <b>Trait</b>          | <b>chr</b>           | <b>Year</b> | <b>Flanking markers</b> | <b>Marker closest to Peak</b> | <b>Position</b> | <b>AA</b> | <b>AA %</b> | <b>R<sup>2</sup></b> |
| EVV                   | Chr 1                | 2013DUS     | K_id1024836-id1026726   | id1026726                     | 158.3           | 0.032     | 20.62%      | 6.3%                 |

|                    |                |         |                                            |                                            |                        |               |        |        |
|--------------------|----------------|---------|--------------------------------------------|--------------------------------------------|------------------------|---------------|--------|--------|
|                    | Chr 9          |         | id9003600-id9004128                        | id9003600                                  | 49.6                   |               |        |        |
| GY                 | Chr 6<br>Chr 8 | 2012DUR | id6010515-id601553<br>id8003773-ud8001270  | id6015531<br>id8003773                     | 107.5<br>56.3          | 52.98         | 43.86% | 4.6%   |
|                    | Chr 6<br>Chr 9 |         |                                            | id6010515-id6015531<br>id9004128-id9005890 | id6015531<br>id9005890 | 107.5<br>58.0 | -70.46 | 48.87% |
|                    | Chr 6<br>Chr 8 | 2013DUR | id6010515-id601553<br>id8003773-ud8001270  | id6015531<br>id8003773                     | 104.5<br>56.3          | 44.32         | 47.23% | 5.1%   |
|                    | Chr 6<br>Chr 9 |         |                                            | id6010515-id6015531<br>id9004128-id9005890 | id6015531<br>id9005890 | 104.5<br>58.0 | -39.55 | 44.14% |
|                    | Chr 4<br>Chr 8 | 2012WUS | id4008719-id4009390<br>id8002306-id8003773 | id4008719<br>id8003773                     | 84.0<br>52.2           | -2.89         | 14.69% | 7.0%   |
| Seedling emergence | Chr 8<br>Chr 9 | 2013DUS | id8000845-id8001326<br>id9006773-id9007315 | id8001326<br>id9007315                     | 25.3<br>86.1           | -0.325        | 4.35%  | 7.2%   |
| RHD                | Chr 5<br>Chr 7 | 2013DUS | id5004150-id5006615<br>id7005557-ud7002101 | id5006615<br>ud7002101                     | 51.6<br>112.6          | 0.177         | 14.74% | 9.4%   |
| DTFNS              | Chr 4<br>Chr 7 | 2013DUN | id4004639-id4005212<br>id7005557-ud7002101 | id4004639<br>ud7002101                     | 39.0<br>108.6          | -1.20         | 1.45%  | 7.3%   |
| Fe conc            | Chr 4<br>Chr 6 | 2013DUS | id4005570-id400683<br>id6006288-id6010515  | id4005570<br>id6010515                     | 51.0<br>68.6           | -326.03       | 70.03% | 11.7%  |
| Mn conc            | Chr 4<br>Chr 6 | 2013DUS | id4005570-id4006835<br>id6006288-id6010515 | id4005570<br>id6010515                     | 51.0<br>69.6           | -8.6689       | 18.49% | 11.9%  |
| Fe uptake          | Chr 4<br>Chr 6 | 2013DUS | id4005570-id400683<br>id6006288-id6010515  | id4005570<br>id6010515                     | 51.0<br>68.6           | -8371.9       | 64.64% | 11.7%  |
| Mn uptake          | Chr 4<br>Chr 6 | 2013DUS | id4005570-id4006835<br>id6006288-id6010515 | id4005570<br>id6010515                     | 51.0<br>69.6           | -265.76       | 20.96% | 16.9%  |

Abbreviated environment codes: *D* = dry season, *W* = wet season, *U* = upland, *L* = lowland, *N* = non-stress (well-watered), *R* = reproductive-stage drought stress, *S* = seedling-stage drought stress

Abbreviated observed traits: *GY*: Grain Yield, *DTF*: Days to flowering, *PHT*: Plant height, *SB*: Shoot biomass, *SW*: Seed weight, *NR*: Nodal root number, *RHL*: Root hair length, *RHD*: Root hair density, *EVV*: Early vegetative vigor, *HI*: Harvest index, *Al*: Aluminum, *Cu*: Copper, *Fe*: Iron, *N*: Nitrogen, *Mn*: Manganese, *P*: Phosphorus, *Zn*: Zinc, *GR*: Gall rating, *chr*: Chromosome, *AA*: Additive x additive

**Table S5.** *QTL identified under different cultivation conditions in the Aus276/3\*MTU1010 population.*

| Trait               | chr                 | Year                  | Flanking markers      | Marker closest to Peak | Position            | Additive effect | Additive effect % | R <sup>2</sup> |
|---------------------|---------------------|-----------------------|-----------------------|------------------------|---------------------|-----------------|-------------------|----------------|
| GY                  | qGY <sub>1,2</sub>  | 2012DUN               | id1000001-K_id1000955 | id1000001              | 0.1                 | -231.40         | 11.7%             | 6.9%           |
|                     |                     | 2013DUN               |                       |                        |                     | -234.77         | 8.3%              | 7.1%           |
|                     |                     | 2012DUR               |                       |                        |                     | -44.09          | 20.6%             | 7.3%           |
|                     |                     | 2013DUR               |                       |                        |                     | -15.41          | 21.8%             | 6.8%           |
|                     | qGY <sub>1,1</sub>  | 2012DLN               | K_id1024973-id1026726 | id1026726              | 167.7               | -307.35         | 7.1%              | 9.3%           |
|                     | qGY <sub>6,2</sub>  | 2012DUR               | id6006288-id6013772   | id6006288              | 60.6                | -58.30          | 26.8%             | 7.9%           |
|                     |                     | 2013DUR               |                       |                        |                     | -48.82          | 20.2%             | 6.2%           |
|                     | qGY <sub>6,1</sub>  | 2012WUS               | id6013772-id6015665   | id6015665              | 105.1               | -7.41           | 14.0 %            | 7.2%           |
|                     |                     | 2013DUS               |                       |                        |                     | -8.89           | 17.1%             | 6.8%           |
|                     |                     | 2012DLR               |                       |                        | id6015665-ud6001296 | 108.3           | 142.99            | 8.7%           |
|                     | qGY <sub>10,1</sub> | 2012DUR               | id10005474-id10006378 | id10006378             | 61.2                | -64.15          | 30.0%             | 8.9%           |
|                     |                     | 2013DUR               |                       |                        | 60.0                | -32.33          | 43.7%             | 10.0%          |
| qGY <sub>11,1</sub> | 2012DLR             | id11001466-id11002436 | id11002436            | 24.3                   | 225.54              | 13.8%           | 8.0%              |                |
| qGY <sub>11,2</sub> | 2012DUN             | id11009201-id11010385 | id11010385            | 108.1                  | -61.63              | 8.7%            | 7.3%              |                |
|                     | 2013DUN             |                       |                       |                        | -37.39              | 6.8%            | 7.6%              |                |
| DTF                 | qDTF <sub>1,1</sub> | 2012DUN               | K_id1021259-id1024167 | id1024167              | 145.2               | 4.4252          | 5.9%              | 6.9%           |
|                     |                     | 2013DUN               | id1024167-K_id1024973 |                        | 149.8               | 3.3731          | 4.5%              | 6.6%           |
|                     |                     | 2012DLN               | K_id1021259-id1024167 |                        | 143.2               | 0.7457          | 9.6%              | 7.5%           |
| PHT                 | qPHT <sub>1,1</sub> | 2012DUN               | id1024167-K_id1024973 | id1024167              | 151.8               | -4.0507         | 3.9%              | 8.2%           |
|                     |                     | 2013DUN               |                       |                        |                     | -4.6728         | 4.1%              | 8.9%           |
|                     |                     | 2012DUR               |                       |                        |                     | -2.5295         | 3.8%              | 6.6%           |
|                     |                     | 2013DUR               |                       |                        |                     | -3.7866         | 5.9%              | 9.4%           |
|                     |                     | 2012DLN               |                       |                        |                     | -6.3468         | 5.2%              | 9.9%           |
|                     |                     | 2013DLR               |                       |                        |                     | -4.5307         | 4.3%              | 8.3%           |
|                     | qPHT <sub>1,3</sub> | 2013DLR               | id1005271-id1006691   | id100527               | 42.5                | -7.4538         | 7.0%              | 8.2%           |
| NR                  | qNR <sub>5,1</sub>  | 2012WUS               | id5000759-id5001182   | id5001182              | 10.3                | 0.9077          | 5.2%              | 6.7%           |
|                     |                     | 2013DUS               |                       |                        | 12.3                | 0.9391          | 6.1%              | 6.6%           |
| EVV                 | qEVV <sub>9,1</sub> | 2012WUS               | id9002704-id9004128   | id9004128              | 49.4                | 0.0189          | 8.9%              | 6.4%           |
|                     |                     | 2013DUS               |                       |                        | 0.0136              | 9.3%            | 6.8%              |                |
| RHL                 | qRHL <sub>1,1</sub> | 2012WUS               | id1000001-K_id1000955 | id1000001              | 0.1                 | 0.0813          | 6.5%              | 6.6%           |
|                     |                     | 2013DUS               |                       |                        |                     | 0.0945          | 7.4%              | 6.9%           |
| RHD                 | qRHD <sub>1,1</sub> | 2012WUS               | id1005271-id1006691   | id1005271              | 44.5                | 0.1194          | 9.8%              | 6.3%           |
|                     |                     | 2013DUS               |                       |                        |                     | 0.1331          | 8.2%              | 6.7%           |
| Seedling            | qDTE <sub>9,1</sub> | 2013DUS               | ud9000737-id9002704   | id9002704              | 40.4                | 0.1578          | 4.2%              | 6.6%           |



| emergence             |                      |         |                       |                        |          |                      |           |                |
|-----------------------|----------------------|---------|-----------------------|------------------------|----------|----------------------|-----------|----------------|
| Biomass               | qBio <sub>11.1</sub> | 2012WUS | id11001466-id11002436 | id11002436             | 25.3     | -11.30               | 20.7%     | 7.9%           |
|                       |                      | 2013DUS |                       |                        |          | -10.55               | 18.2%     | 7.3%           |
| HI                    | qHI <sub>11.1</sub>  | 2013DUN | id11001466-id11002436 | id11002436             | 28.1     | -6.13                | 10.2%     | 10.0%          |
|                       | qHI <sub>11.2</sub>  | 2013DUR |                       |                        |          | id6006288- id6013772 | id6013772 | 85.5           |
| P conc (veg stage)    | qPC <sub>6.1</sub>   | 2012WUS | id6006288-id6013772   | id6013772              | 95.6     | -0.2125              | 17.4%     | 14.4%          |
|                       |                      | 2013DUS |                       |                        |          | 88.6                 | -0.3157   | 27.5%          |
| P uptake (veg stage)  | qPU <sub>4.1</sub>   | 2012WUS | id4008522-id4009900   | id4008522              | 80.9     | -0.4256              | 14.1%     | 16.1%          |
|                       |                      | 2013DUS |                       |                        |          | 81.9                 | -0.4211   | 13.8%          |
| <b>Epistatic QTLs</b> |                      |         |                       |                        |          |                      |           |                |
| Trait                 | chr                  | Year    | Flanking markers      | Marker closest to Peak | Position | AA effect            | AA%       | R <sup>2</sup> |
| P uptake (veg stage)  | qPU <sub>1.1</sub>   | 2012WUS | id1005271-id1006691   | id1005271              | 45.5     | -1.1654              | 38.6%     | 16.7%          |
|                       | qPU <sub>6.1</sub>   | 2013DUS | id6006288-id6013772   | id6006288              | 59.6     | -1.1597              | 38.1%     | 17.4%          |
| DTF                   | qDTF <sub>4.1</sub>  | 2012DUR | id4006835-id4008522   | id4006835              | 66.6     | 2.0344               | 2.2%      | 5.7%           |
|                       | qDTF <sub>6.1</sub>  |         | id6013772-id6015665   | id6013772              | 104.1    |                      |           | 3.0%           |
| Dry shoot weight      | qDSW <sub>2.1</sub>  | 2012WUS | id2007378-id2007507   | id2007507              | 72.6     | 0.0172               | 28.1%     | 10.8%          |
|                       | qDSW <sub>10.1</sub> |         | id10006378-id10006740 | id10006740             | 67.8     |                      |           |                |

Abbreviated environment codes: *D* = dry season, *W* = wet season, *U* = upland, *L* = lowland, *N* = non-stress (well-watered), *R* = reproductive-stage drought stress, *S* = seedling-stage drought stress

Abbreviated observed traits: *GY*: Grain Yield, *DTF*: Days to flowering, *PHT*: Plant height, *HI*: Harvest index, *SW*: Seed weight, *NR*: Nodal root number, *RHL*: Root hair length, *RHD*: Root hair density, *EVV*: Early vegetative vigor, *P*: Phosphorus, *AA*: Additive x additive

**Table S6.** Percentage improvement of genotypes possessing QTL (QTL +) under different conditions over lines not possessing QTLs (QTL -) for the Aus276/3\*IR64 population.

| Aus276/3*IR64                |                     |            |                       |         |         |      |              |
|------------------------------|---------------------|------------|-----------------------|---------|---------|------|--------------|
| Trait                        | QTL                 | Experiment | Markers               | QTL (+) | QTL (-) | IR64 | Increase (%) |
| GY<br>(kg ha <sup>-1</sup> ) | qGY <sub>6,1</sub>  | 2012DUR    | id6010515             | 1195.64 | 1059.44 | 593  | 12.9%        |
|                              |                     |            | id6015531             | 1159.59 | 1002.23 | 593  | 15.7%        |
|                              |                     |            | id6010515+ id6015531  | 1197.14 | 1012.29 | 593  | 18.7%        |
|                              |                     | 2013DUR    | id6010515             | 821.56  | 741.48  | 492  | 10.8%        |
|                              |                     |            | id6015531             | 809.17  | 709.33  | 492  | 14.1%        |
|                              |                     |            | id6010515+ id6015531  | 839.32  | 713.80  | 492  | 17.6%        |
|                              | qGY <sub>8,1</sub>  | 2012DUR    | id8003773             | 1268.48 | 1017.11 | 593  | 24.7%        |
|                              |                     |            | ud8001270             | 1230.14 | 1036.28 | 593  | 18.7%        |
|                              |                     |            | id8003773+ud8001270   | 1457.83 | 1154.09 | 593  | 26.3%        |
|                              |                     | 2013DUR    | id8003773             | 795.77  | 738.81  | 492  | 7.7%         |
|                              |                     |            | ud8001270             | 764.77  | 684.31  | 492  | 11.8%        |
|                              |                     |            | id8003773+ud8001270   | 852.50  | 712.84  | 492  | 19.6%        |
|                              | qGY <sub>9,2</sub>  | 2012DUR    | id9004128             | 1169.25 | 1005.00 | 593  | 16.3%        |
|                              |                     |            | id9005890             | 1189.01 | 1095.09 | 593  | 8.6%         |
|                              |                     |            | id9004128+id9005890   | 1215.66 | 1017.34 | 593  | 19.5%        |
|                              |                     | 2013DUR    | id9004128             | 785.45  | 717.54  | 492  | 9.4%         |
|                              |                     |            | id9005890             | 814.51  | 758.47  | 492  | 7.4%         |
|                              |                     |            | id9004128+id9005890   | 850.61  | 766.65  | 492  | 11.0%        |
|                              | qGY <sub>9,1</sub>  | 2012WUS    | id9003600             | 644.34  | 547.39  | 533  | 17.7%        |
|                              |                     |            | id9004128             | 561.54  | 453.44  | 533  | 23.8%        |
|                              |                     |            | id9003600+id9004128   | 711.32  | 533.23  | 533  | 33.4%        |
|                              |                     | 2013DUS    | id9003600             | 870.34  | 752.85  | 727  | 15.6%        |
|                              |                     |            | id9004128             | 756.57  | 650.85  | 727  | 16.3%        |
|                              |                     |            | id9003600+id9004128   | 925.33  | 749.13  | 727  | 23.5%        |
|                              | qGY <sub>10,1</sub> | 2012DUN    | id10006378            | 1756.12 | 1555.57 | 1663 | 12.9%        |
|                              |                     |            | id10005369            | 1683.05 | 1592.10 | 1663 | 5.7%         |
|                              |                     |            | id10006378+id10005369 | 1808.55 | 1579.09 | 1663 | 14.5%        |
|                              |                     | 2013DUN    | id10006378            | 2521.26 | 2343.66 | 1926 | 7.6%         |
|                              |                     |            | id10005369            | 2250.08 | 2131.14 | 1926 | 5.5%         |
|                              |                     |            | id10006378+id10005369 | 2429.04 | 2177.25 | 1926 | 11.6%        |
|                              |                     | 2012DLN    | id10006378            | 4498.38 | 4265.36 | 3211 | 5.4%         |
|                              |                     |            | id10005369            | 4573.57 | 4268.18 | 3211 | 7.1%         |
|                              |                     |            | id10006378+id10005369 | 4990.27 | 4487.97 | 3211 | 11.2%        |
|                              |                     | 2012DLR    | id10006378            | 2761.69 | 2465.60 | 2368 | 12.1%        |
|                              |                     |            | id10005369            | 2827.73 | 2422.45 | 2368 | 16.7%        |
|                              |                     |            | id10006378+id10005369 | 3241.93 | 2703.48 | 2368 | 19.9%        |
|                              | qGY <sub>1,1</sub>  | 2013DUN    | K_id1024836           | 2441.99 | 2217.57 | 1926 | 10.1%        |
|                              |                     |            | id1026726             | 2332.11 | 2212.51 | 1926 | 5.4%         |
|                              |                     |            | K_id1024836+id1026726 | 2709.14 | 2402.37 | 1926 | 12.8%        |
|                              |                     | 2012DLN    | K_id1024836           | 4601.77 | 4367.01 | 3211 | 5.3%         |
|                              |                     |            | id1026726             | 4864.22 | 4295.79 | 3211 | 13.2%        |
|                              |                     |            | K_id1024836+id1026726 | 4980.83 | 4178.59 | 3211 | 19.2%        |
| RHL                          | qRHL <sub>8,1</sub> | 2012WUS    | id8002306             | 1.391   | 1.110   | 1.02 | 25.3%        |
|                              |                     |            | id8003773             | 1.410   | 1.198   | 1.02 | 17.5%        |
|                              |                     |            | id8002306+id8003773   | 1.580   | 1.090   | 1.02 | 44.9%        |
|                              |                     | 2013DUS    | id8002306             | 1.301   | 1.010   | 1.11 | 28.8%        |
|                              |                     |            | id8003773             | 1.376   | 1.145   | 1.11 | 20.2%        |
| RHD                          | qRHD <sub>6,1</sub> | 2012WUS    | id5004150             | 1.39    | 1.10    | 1.09 | 26.4%        |
|                              |                     |            | id5006615             | 1.30    | 1.09    | 1.09 | 19.3%        |
|                              |                     |            | id5004150+id5006615   | 1.46    | 1.06    | 1.09 | 37.7%        |
|                              |                     | 2013DUS    | id5004150             | 1.23    | 1.07    | 1.17 | 14.9%        |
|                              |                     |            | id5006615             | 1.24    | 1.04    | 1.17 | 18.2%        |

|                                                         |                     |         |                     |         |         |        |        |
|---------------------------------------------------------|---------------------|---------|---------------------|---------|---------|--------|--------|
|                                                         | qRHD <sub>8,1</sub> | 2012WUS | id5004150+id5006615 | 1.27    | 1.02    | 1.17   | 24.5%  |
|                                                         |                     |         | id8000536           | 1.25    | 1.09    | 1.09   | 22.5%  |
|                                                         |                     |         | id8000845           | 1.27    | 1.01    | 1.09   | 25.7%  |
|                                                         |                     |         | id8000536+id8000845 | 1.33    | 1.05    | 1.09   | 26.7%  |
|                                                         |                     | 2013DUS | id8000536           | 1.38    | 1.17    | 1.17   | 17.9%  |
|                                                         |                     |         | id8000845           | 1.34    | 1.11    | 1.17   | 20.7%  |
| id8000536+id8000845                                     | 1.39                |         | 1.12                | 1.17    | 24.1%   |        |        |
| NR                                                      | qNR <sub>4,1</sub>  | 2012WUS | id4001205           | 24.86   | 21.63   | 20.7   | 15.1%  |
|                                                         |                     |         | id4002844           | 22.71   | 19.52   | 20.7   | 16.3%  |
|                                                         |                     |         | id4001205+id4002844 | 26.61   | 22.13   | 20.7   | 20.2%  |
|                                                         |                     | 2013DUS | id4001205           | 23.93   | 21.21   | 23.3   | 12.8%  |
|                                                         |                     |         | id4002844           | 23.52   | 21.77   | 23.3   | 8.1%   |
|                                                         |                     |         | id4001205+id4002844 | 24.59   | 20.95   | 23.3   | 17.4%  |
| EVV                                                     | qEVV <sub>9,1</sub> | 2012WUS | id9003600           | 0.233   | 0.203   | 0.220  | 14.8%  |
|                                                         |                     |         | id9004128           | 0.264   | 0.245   | 0.220  | 7.8%   |
|                                                         |                     |         | id9003600+id9004128 | 0.284   | 0.246   | 0.220  | 15.5%  |
|                                                         |                     | 2013DUS | id9003600           | 0.172   | 0.155   | 0.166  | 10.9%  |
|                                                         |                     |         | id9004128           | 0.169   | 0.152   | 0.166  | 11.1%  |
|                                                         |                     |         | id9003600+id9004128 | 0.192   | 0.161   | 0.166  | 19.2%  |
| P uptake (reproductive stage) (mg plant <sup>-1</sup> ) | qPU <sub>5,2</sub>  | 2013DUS | id5006615           | 8.15    | 6.77    | 6.18   | 20.4%  |
|                                                         |                     |         | id500730            | 7.80    | 6.42    | 6.18   | 21.5%  |
|                                                         |                     |         | id5006615+id500730  | 9.21    | 7.44    | 6.18   | 23.8%  |
| P conc (seedling stage) (mg)                            | qPU <sub>5,2</sub>  | 2012WUS | id5006615           | 3.15    | 2.66    | 1.73   | 18.4%  |
|                                                         |                     |         | id500730            | 2.95    | 2.35    | 1.73   | 25.5%  |
|                                                         |                     |         | id5006615+id500730  | 3.23    | 2.54    | 1.73   | 27.1%  |
|                                                         |                     | 2013DUS | id5006615           | 2.50    | 1.86    | 1.36   | 34.4%  |
|                                                         |                     |         | id500730            | 2.40    | 1.92    | 1.36   | 25.0%  |
|                                                         |                     |         | id5006615+id500730  | 2.80    | 1.99    | 1.36   | 40.7%  |
| P conc (reproductive stage) (mg)                        | qPU <sub>5,2</sub>  | 2013DUS | id5006615           | 0.282   | 0.241   | 0.250  | 17.1%  |
|                                                         |                     |         | id500730            | 0.270   | 0.232   | 0.250  | 16.4%  |
|                                                         |                     |         | id5006615+id500730  | 0.303   | 0.245   | 0.250  | 23.7%  |
| Al uptake (µg plant <sup>-1</sup> )                     | qAlU <sub>5,2</sub> | 2013DUS | id5006615           | 7034.31 | 6262.56 | 5762.1 | 12.3%  |
|                                                         |                     |         | id5007304           | 5845.47 | 4851.22 | 5762.1 | 20.5%  |
|                                                         |                     |         | id5006615+id500730  | 6351.48 | 5185.66 | 5762.1 | 22.5%  |
| Al conc (µg)                                            | qAl <sub>5,2</sub>  | 2013DUS | id5006615           | 532.90  | 460.00  | 233    | 15.7%  |
|                                                         |                     |         | id5007304           | 447.11  | 395.79  | 233    | 13.29% |
|                                                         |                     |         | id5006615+id500730  | 772.22  | 638.00  | 233    | 21.1%  |
| Fe uptake (µg plant <sup>-1</sup> )                     | qFeU <sub>5,2</sub> | 2013DUS | id5006615           | 7163.13 | 6265.88 | 5673.1 | 14.3%  |
|                                                         |                     |         | id5007304           | 5753.01 | 5175.33 | 5673.1 | 11.2%  |
|                                                         |                     |         | id5006615+id500730  | 6461.20 | 5386.93 | 5673.1 | 19.9%  |
| Fe conc (µg)                                            | qFe <sub>5,2</sub>  | 2013DUS | id5006615           | 516.90  | 467.00  | 229.4  | 10.5%  |
|                                                         |                     |         | id5007304           | 433.94  | 379.95  | 229.4  | 14.2%  |
|                                                         |                     |         | id5006615+id500730  | 736.89  | 633.00  | 229.4  | 16.3%  |
| N uptake (mg plant <sup>-1</sup> )                      | qNU <sub>5,1</sub>  | 2013DUS | id5006615           | 24.60   | 21.08   | 23.80  | 16.7%  |
|                                                         |                     |         | id5007304           | 27.00   | 23.68   | 23.80  | 14.0%  |
|                                                         |                     |         | id5006615+id500730  | 21.30   | 17.47   | 23.80  | 21.9%  |
| N conc (mg)                                             | qN <sub>5,1</sub>   | 2013DUS | id5006615           | 0.916   | 0.746   | 0.832  | 22.8%  |
|                                                         |                     |         | id5007304           | 0.852   | 0.733   | 0.832  | 16.2%  |
|                                                         |                     |         | id5006615+id500730  | 0.887   | 0.685   | 0.832  | 29.5%  |
| Zn uptake (µg plant <sup>-1</sup> )                     | qZnU <sub>4,1</sub> | 2013DUS | id4002844           | 754.17  | 676.23  | 670.18 | 11.5%  |
|                                                         |                     |         | id4004639           | 820.13  | 708.24  | 670.18 | 15.8%  |
|                                                         |                     |         | id4002844+id4004639 | 829.70  | 715.47  | 670.18 | 16.0%  |
| Cu conc (mg)                                            | qCu <sub>8,1</sub>  | 2013DUS | id8000845           | 4.614   | 3.992   | 4.51   | 15.6%  |
|                                                         |                     |         | id8001326           | 4.829   | 4.141   | 4.51   | 16.6%  |
|                                                         |                     |         | id8000845+id8001326 | 5.083   | 4.275   | 4.51   | 18.9%  |
| Nematode GR                                             | qGR <sub>5,2</sub>  | 2013DUS | id5006615           | 3.16    | 3.00    | 3.00   | 5.3%   |
|                                                         |                     |         | id5007304           | 3.00    | 2.89    | 3.00   | 3.8%   |

|  |  |  |                     |      |      |      |       |
|--|--|--|---------------------|------|------|------|-------|
|  |  |  | id5006615+id5007304 | 3.89 | 3.33 | 3.00 | 16.8% |
|--|--|--|---------------------|------|------|------|-------|

Abbreviated environment codes: *D* = dry season, *W* = wet season, *U* = upland, *L* = lowland, *N* = non-stress (well-watered), *R* = reproductive-stage drought stress, *S* = seedling-stage drought stress

Abbreviated observed traits: *GY*: Grain yield, *EVV*: Early vegetative vigor, *NR*: Number of nodal root, *RHL*: Root hair length, *RHD*: Root hair density, *P*: Phosphorus, *Al*: Aluminum, *N*: Nitrogen, *Fe*: Iron, *Zn*: Zinc, *Cu*: Copper, *Conc*: concentration, *GR*: gall rating

**Table S7.** Percentage improvement of genotypes possessing QTL (QTL +) under different conditions over lines not possessing QTLs (QTL -) for the Aus276/3\*MTU1010 population

| Aus276 x MTU1010             |                     |                       |                       |         |         |         |                 |
|------------------------------|---------------------|-----------------------|-----------------------|---------|---------|---------|-----------------|
| Trait                        | QTL                 | Trial                 | Markers               | QTL (+) | QTL (-) | MTU1010 | Improvement (%) |
| GY<br>(kg ha <sup>-1</sup> ) | qGY <sub>1,1</sub>  | 2012DUN               | id1000001             | 3680    | 3285    | 3388    | 12.0%           |
|                              |                     |                       | K_id1000955           | 3831    | 3509    | 3388    | 9.2%            |
|                              |                     |                       | id100000+K_id1000955  | 3849    | 3339    | 3388    | 15.3%           |
|                              |                     | 2013DUN               | id1000001             | 4203    | 3866    | 4048    | 8.7%            |
|                              |                     |                       | K_id1000955           | 4208    | 3922    | 4048    | 7.3%            |
|                              |                     |                       | id100000+K_id1000955  | 4316    | 3724    | 4048    | 15.9%           |
|                              |                     | 2012DUR               | id1000001             | 806     | 711     | 643     | 13.4%           |
|                              |                     |                       | K_id1000955           | 766     | 691     | 643     | 10.9%           |
|                              |                     |                       | id100000+K_id1000955  | 928     | 775     | 643     | 19.5%           |
|                              | 2013DUR             | id1000001             | 693                   | 594     | 522     | 16.6%   |                 |
|                              |                     | K_id1000955           | 651                   | 585     | 522     | 11.3%   |                 |
|                              |                     | id100000+K_id1000955  | 790                   | 667     | 522     | 18.3%   |                 |
|                              | qGY <sub>1,2</sub>  | 2012DLN               | K_id1024973           | 4428    | 4037    | 3432    | 9.7%            |
|                              |                     |                       | id1026726             | 4472    | 4098    | 3432    | 9.1%            |
|                              |                     |                       | K_id1024973+id1026726 | 4582    | 4025    | 3432    | 13.8%           |
|                              | qGY <sub>6,1</sub>  | 2012DUR               | id6006288             | 715     | 626     | 643     | 14.4%           |
|                              |                     |                       | id6013772             | 747     | 644     | 643     | 16.1%           |
|                              |                     |                       | id6006288+id6013772   | 857     | 694     | 643     | 23.6%           |
|                              |                     | 2013DUR               | id6006288             | 666     | 595     | 522     | 12.1%           |
|                              |                     |                       | id6013772             | 807     | 721     | 522     | 12.0%           |
|                              |                     |                       | id6006288+id6013772   | 846     | 714     | 522     | 18.5%           |
|                              | qGY <sub>6,2</sub>  | 2012WUS               | id6013772             | 541     | 473     | 472     | 14.3%           |
|                              |                     |                       | id6015665             | 471     | 418     | 472     | 12.7%           |
|                              |                     |                       | id6013772+id6015665   | 538     | 458     | 472     | 17.5%           |
|                              |                     | 2013DUS               | id6013772             | 594     | 525     | 545     | 13.1%           |
|                              |                     |                       | id6015665             | 564     | 512     | 545     | 10.2%           |
|                              |                     |                       | id6013772+id6015665   | 683     | 577     | 545     | 18.3%           |
|                              | qGY <sub>10,1</sub> | 2012DUR               | id10005474            | 709     | 641     | 643     | 10.6%           |
|                              |                     |                       | id10006378            | 722     | 632     | 643     | 14.3%           |
|                              |                     |                       | id10005474+id10006378 | 882     | 740     | 643     | 19.2%           |
| 2013DUR                      |                     | id10005474            | 594                   | 510     | 522     | 16.5%   |                 |
|                              |                     | id10006378            | 513                   | 458     | 522     | 11.9%   |                 |
|                              |                     | id10005474+id10006378 | 740                   | 608     | 522     | 21.7%   |                 |
| qGY <sub>11,1</sub>          | 2012DLR             | id11001466            | 1533                  | 1401    | 1172    | 9.4%    |                 |
|                              |                     | id11002436            | 1903                  | 1776    | 1172    | 7.1%    |                 |
|                              |                     | id11001466+id11002436 | 2136                  | 1827    | 1172    | 16.9%   |                 |
| EVV                          | qEVV <sub>9,1</sub> | 2012WUS               | ud9000737             | 0.218   | 0.202   | 0.092   | 8.1%            |
|                              |                     |                       | id9002704             | 0.208   | 0.197   | 0.092   | 5.7%            |
|                              |                     |                       | ud9000737+id9002704   | 0.222   | 0.198   | 0.092   | 11.8%           |
|                              |                     | 2013DUS               | ud9000737             | 0.152   | 0.136   | 0.0706  | 11.7%           |
|                              |                     |                       | id9002704             | 0.144   | 0.131   | 0.0706  | 10.1%           |
|                              |                     |                       | ud9000737+id9002704   | 0.160   | 0.139   | 0.0706  | 15.7%           |
| Seedling emergence           | qDTE <sub>9,1</sub> | 2013DUS               | ud9000737             | 3.71    | 3.83    | 4.0     | 3.2%            |
|                              |                     |                       | id9002704             | 3.71    | 3.83    | 4.0     | 3.0%            |
|                              |                     |                       | ud9000737+id9002704   | 3.43    | 3.79    | 4.0     | 9.5%            |
| NR                           | qNR <sub>5,1</sub>  | 2012WUS               | id5000759             | 26.7    | 26      | 24      | 2.7%            |
|                              |                     |                       | id5001182             | 27.4    | 25.7    | 24      | 6.8%            |
|                              |                     |                       | id5000759+id5001182   | 28.1    | 24.6    | 24      | 14.2%           |
|                              |                     | 2013DUS               | id5000759             | 25.5    | 24.6    | 23      | 3.9%            |
|                              |                     |                       | id5001182             | 25.1    | 24.2    | 23      | 3.9%            |
| RHL                          | qRHL <sub>1,1</sub> | 2012WUS               | id1000001             | 1.33    | 1.28    | 1.16    | 4.1%            |
|                              |                     |                       | K_id1000955           | 1.57    | 1.40    | 1.16    | 12.3%           |

|     |                     |         |                       |      |      |      |       |
|-----|---------------------|---------|-----------------------|------|------|------|-------|
|     |                     |         | id1000001+K_id1000955 | 1.71 | 1.46 | 1.16 | 17.3% |
|     |                     | 2013DUS | id1000001             | 1.34 | 1.25 | 1.13 | 6.9%  |
|     |                     |         | K_id1000955           | 1.50 | 1.36 | 1.13 | 10.1% |
|     |                     |         | id1000001+K_id1000955 | 1.70 | 1.49 | 1.13 | 13.9% |
| RHD | qRHD <sub>1,1</sub> | 2012WUS | id1005271             | 1.33 | 1.26 | 1.32 | 5.6%  |
|     |                     |         | id1006691             | 1.40 | 1.25 | 1.32 | 12.4% |
|     |                     |         | id1005271+id1006691   | 1.50 | 1.26 | 1.32 | 19.2% |
|     |                     | 2013DUS | id1005271             | 1.28 | 1.19 | 1.27 | 7.4%  |
|     |                     |         | id1006691             | 1.22 | 1.17 | 1.27 | 4.3%  |
|     |                     |         | id1005271+id1006691   | 1.29 | 1.16 | 1.27 | 11.4% |

Abbreviated environment codes: *U* = upland, *L* = lowland, *D* = dry season, *W* = wet season, *N* = non-stress (well-watered), *R* = reproductive-stage drought stress, *S* = seedling-stage drought stress

Abbreviated observed traits: *GY*: Grain yield, *EVV*: Early vegetative vigor, *NR*: Number of nodal root, *RHL*: Root hair length, *RHD*: Root hair density

**Table S8.** *Broad-sense heritability (H) of different nutrients in Aus276/3\*IR64 mapping population.*

| <b>Population</b> | <b>Trait</b>     | <b>2013DUS</b> |
|-------------------|------------------|----------------|
| Aus276/3*IR64     | Al concentration | 0.48           |
|                   | Ca concentration | 0.42           |
|                   | Cu concentration | 0.72           |
|                   | Mg concentration | 0.43           |
|                   | Fe concentration | 0.44           |
|                   | Mn concentration | 0.1            |
|                   | Na concentration | 0.32           |
|                   | S concentration  | 0.63           |
|                   | Zn concentration | 0.34           |
|                   | Al uptake        | 0.86           |
|                   | Ca uptake        | 0.21           |
|                   | Cu uptake        | 0.51           |
|                   | Mg uptake        | 0.21           |
|                   | Fe uptake        | 0.88           |
|                   | Mn uptake        | 0.18           |
|                   | Na uptake        | 0.25           |
|                   | S uptake         | 0.40           |
|                   | Zn uptake        | 0.22           |

**Table S9.** Status of the selected lines in Aus276/3\*IR64 and Aus276/3\*MTU1010 populations.

| S No.            | Designation      | QTLs                                                                                                                                                                                           |
|------------------|------------------|------------------------------------------------------------------------------------------------------------------------------------------------------------------------------------------------|
| Aus276/3*IR64    |                  |                                                                                                                                                                                                |
| 1                | IR 94225-B-10-B  | qRHL <sub>8.1</sub> , qGY <sub>6.1</sub> , qGY <sub>8.1</sub> , qGY <sub>9.1</sub> , qGY <sub>9.2</sub> , qGY <sub>10.1</sub>                                                                  |
| 2                | IR 94225-B-82-B  | qNR <sub>4.1</sub> , qRHD <sub>5.1</sub> , qRHD <sub>8.1</sub> , qGY <sub>6.1</sub> , qGY <sub>8.1</sub> , qGY <sub>10.1</sub>                                                                 |
| 3                | IR 94225-B-201-B | qNR <sub>4.1</sub> , qRHD <sub>5.1</sub> , qRHD <sub>8.1</sub> , qRHL <sub>8.1</sub> , qGY <sub>6.1</sub> , qGY <sub>8.1</sub> , qGY <sub>9.1</sub> , qGY <sub>9.2</sub> , qGY <sub>10.1</sub> |
| 4                | IR 94225-B-375-B | qNR <sub>4.1</sub> , qRHD <sub>5.1</sub> , qRHD <sub>8.1</sub> , qRHL <sub>8.1</sub> , qGY <sub>6.1</sub> , qGY <sub>8.1</sub> , qGY <sub>9.1</sub> , qGY <sub>9.2</sub> , qGY <sub>10.1</sub> |
| 5                | IR 94225-B-394-B | qNR <sub>4.1</sub> , qRHD <sub>5.1</sub> , qRHD <sub>8.1</sub> , qRHL <sub>8.1</sub> , qGY <sub>8.1</sub> , qGY <sub>9.1</sub> , qGY <sub>9.2</sub> , qGY <sub>10.1</sub>                      |
| 6                | IR 94225-B-474-B | qNR <sub>4.1</sub> , qRHD <sub>5.1</sub> , qRHL <sub>8.1</sub> , qGY <sub>6.1</sub> , qGY <sub>8.1</sub> , qGY <sub>9.1</sub> , qGY <sub>9.2</sub> , qGY <sub>10.1</sub>                       |
| Aus276/3*MTU1010 |                  |                                                                                                                                                                                                |
| 7                | IR 94226-B-11-B  | qNR <sub>5.1</sub> , qEVV <sub>9.1</sub> , qRHD <sub>1.1</sub> , qGY <sub>6.1</sub> , qGY <sub>10.1</sub> , qGY <sub>1.1</sub>                                                                 |
| 8                | IR 94226-B-15-B  | qNR <sub>5.1</sub> , qEVV <sub>9.1</sub> , qRHD <sub>1.1</sub> , qGY <sub>6.1</sub> , qGY <sub>10.1</sub> , qGY <sub>1.1</sub>                                                                 |
| 9                | IR 94226-B-61-B  | qEVV <sub>9.1</sub> , qRHL <sub>1.1</sub> , qRHD <sub>1.1</sub> , qGY <sub>6.1</sub> , qGY <sub>10.1</sub> , qGY <sub>1.1</sub>                                                                |
| 10               | IR 94226-B-177-B | qNR <sub>5.1</sub> , qEVV <sub>9.1</sub> , qRHD <sub>1.1</sub> , qGY <sub>6.1</sub> , qGY <sub>10.1</sub> , qGY <sub>1.1</sub>                                                                 |
| 11               | IR 94226-B-462-B | qNR <sub>5.1</sub> , qEVV <sub>9.1</sub> , qRHL <sub>1.1</sub> , qRHD <sub>1.1</sub> , qGY <sub>6.1</sub> , qGY <sub>10.1</sub> , qGY <sub>1.1</sub>                                           |
| 12               | IR 94226-B-474-B | qEVV <sub>9.1</sub> , qRHD <sub>1.1</sub> , qGY <sub>6.1</sub> , qGY <sub>10.1</sub> , qGY <sub>1.1</sub>                                                                                      |



**Table S10.** *The percentage improvement of lines possessing qGY<sub>10.1</sub> and qDTF<sub>10.1</sub> in Aus276/3\*IR64 population.*

| Experiment | QTL                                        | QTL (+) | QTL (-) | IR64 | % improvement |
|------------|--------------------------------------------|---------|---------|------|---------------|
| 2012DUN    | qGY <sub>10.1</sub> + qDTF <sub>10.1</sub> | 1756.12 | 1555.57 | 1663 | 12.89         |
| 2012DLN    | qGY <sub>10.1</sub> + qDTF <sub>10.1</sub> | 4498.38 | 4265.36 | 3211 | 5.46          |
| 2012DLR    | qGY <sub>10.1</sub> + qDTF <sub>10.1</sub> | 2761.69 | 2465.6  | 2368 | 12.01         |
| 2012DUN    | qGY <sub>10.1</sub> + qDTF <sub>10.1</sub> | 74      | 82      | 85   | 8 days        |
| 2012DLN    | qGY <sub>10.1</sub> + qDTF <sub>10.1</sub> | 71      | 80      | 80   | 9 days        |

*GY: Grain yield (Kg ha<sup>-1</sup>), DTF: Days to flowering*

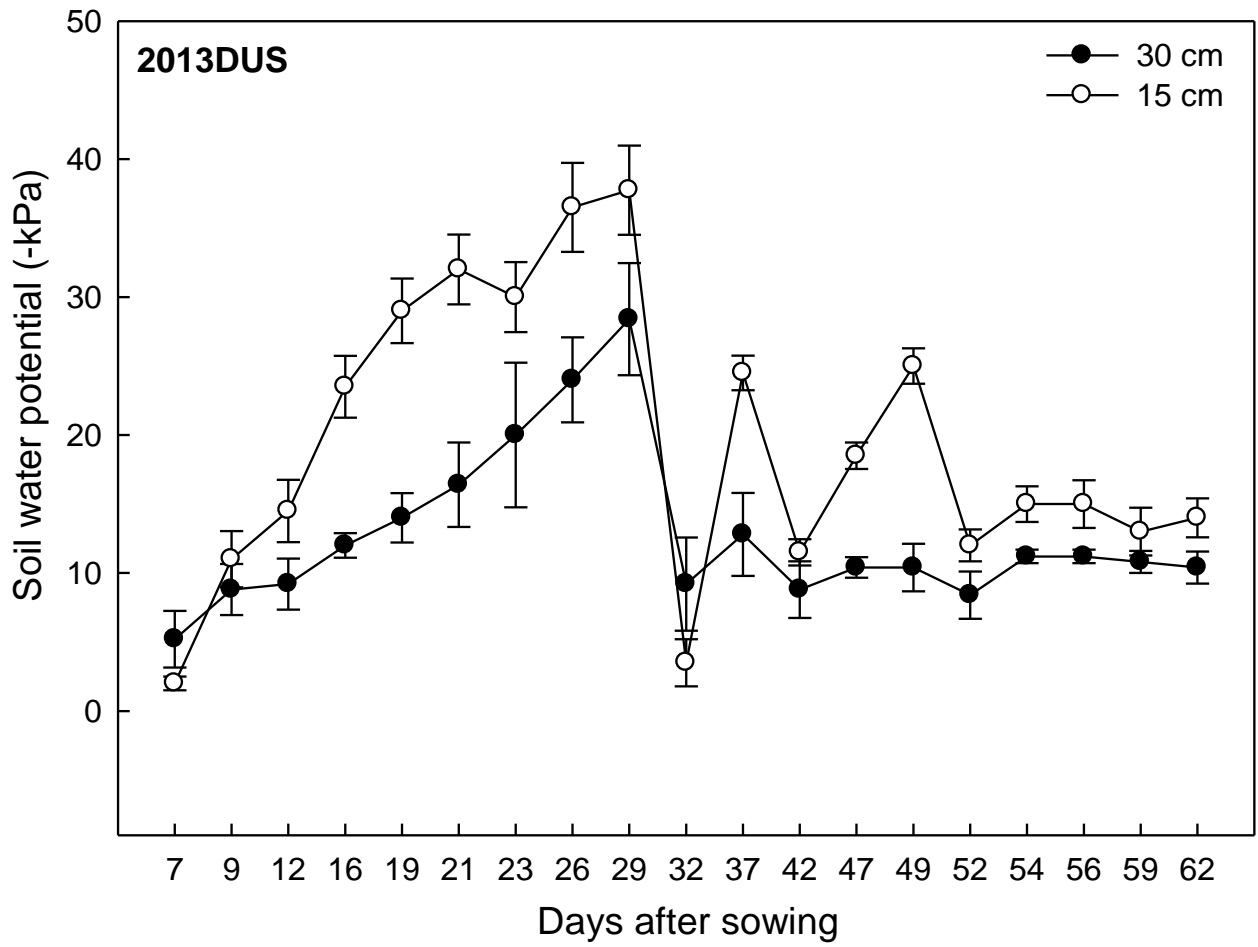

**Figure S1.** Soil water potential measured by tensiometers at soil depths of 15 and 30 cm (2013DUS). Values shown are mean +SE, n=3.

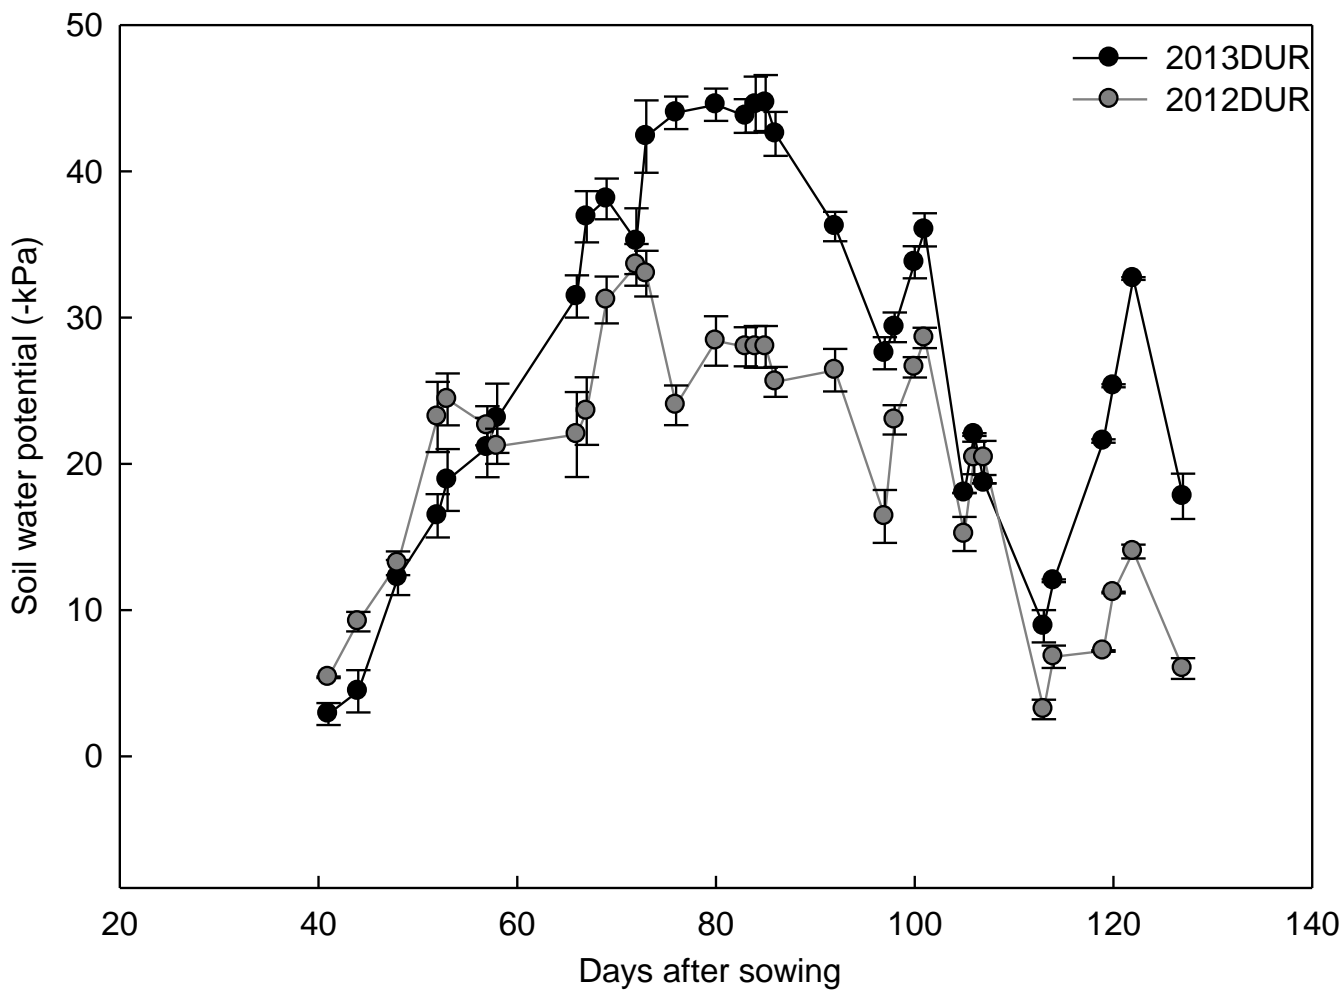

**Figure S2.** Soil water potential measured by tensiometers at soil depths of 30 cm (2012DUR and 2013DUR, Reproductive stage stress experiments). Values shown are mean +SE, n=3.

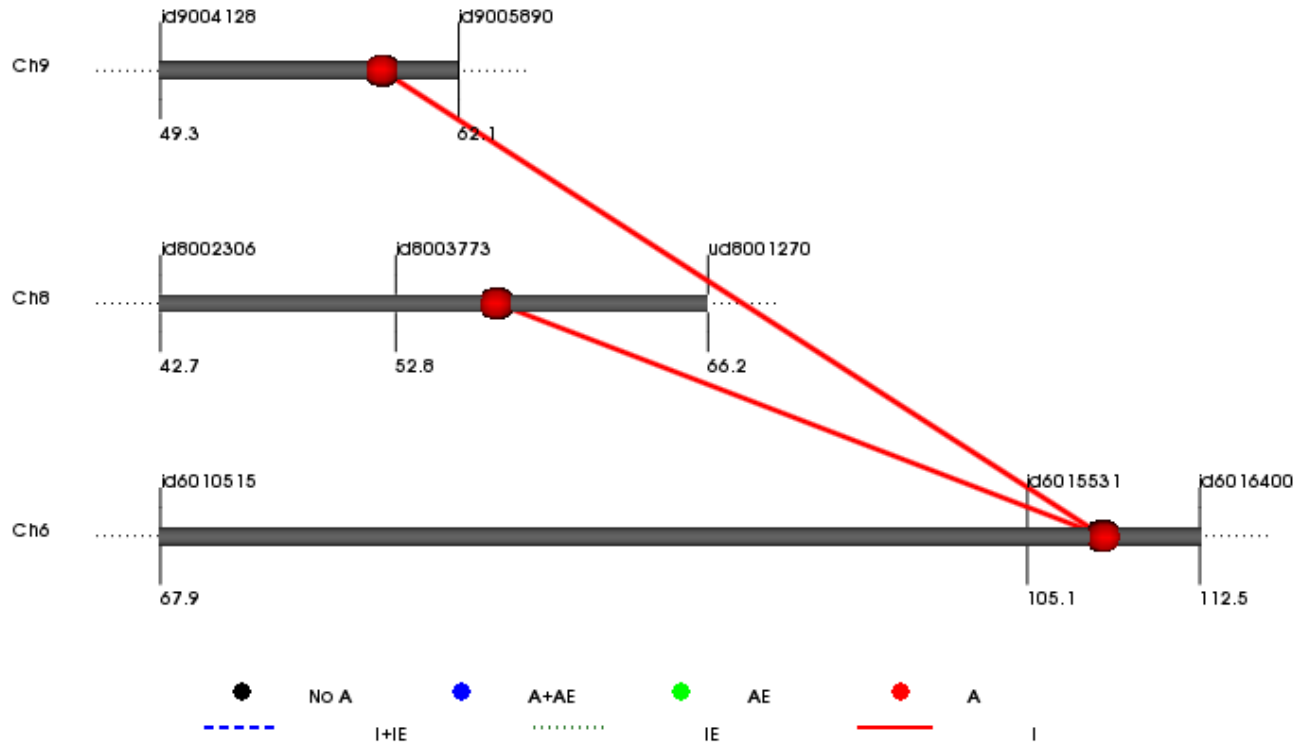

**Figure S3.** Major and epistatic QTLs for GY showing interaction between genomic locations on chromosome 6, 8 and 9 in the Aus276/3\*IR64 population (A: Additive effect, I: Epistatic main effect, IE: Epistasis x Environment interaction, AE: Additive x Environment interaction).

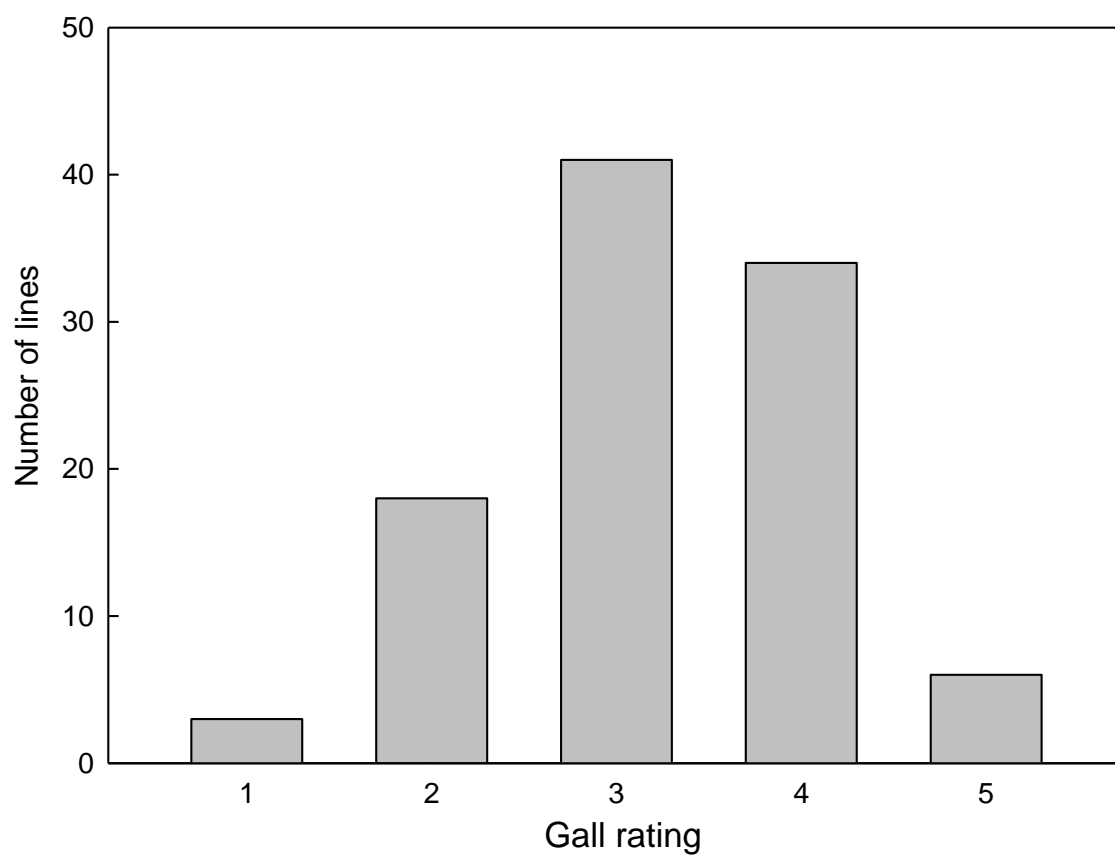

**Figure S4.** Distribution of genotypes showing gall infection on a gall rating scale of 1-5 in the Aus276/3\*IR64 population (2013DUS).
